# Supplementary material for: Controlled synthesis of polycarbonate diols and their polylactide block copolymers using amino-bis(phenolate) chromium hydroxide complexes
Source: Royal Society of Chemistry journal article supplement (doi:10.1039/d3dt03168c), 2023-01-01
Supplement: d3dt03168c1.pdf [file d3dt03168c1.pdf]

*Electronic Supplementary Information for*

**Controlled Synthesis of Polycarbonate Diols and Their Polylactide Block Copolymers using Amino-bis(phenolate) Chromium Hydroxide Complexes**

*Kaijie Ni<sup>‡</sup>,<sup>a</sup> Louise N. Dawe,<sup>b</sup> Amy A. Sarjeant<sup>c</sup> and Christopher M. Kozak<sup>\*a</sup>*

*<sup>‡</sup> Current address: College of Chemistry and Materials Engineering, Zhejiang A&F University, Hangzhou, Zhejiang, 311300, China*

*<sup>a</sup> Department of Chemistry, Memorial University of Newfoundland, St. John's, Newfoundland, A1C 5S7, Canada. E-mail: ckozak@mun.ca; Tel: +1-709-864-8082*

*<sup>b</sup> Department of Chemistry and Biochemistry, Wilfrid Laurier University, 75 University Ave. W. Waterloo, Ontario, N2L 3C5, Canada*

*<sup>c</sup> Drug Product Development, Bristol Myers Squibb Company, New Brunswick, New Jersey 08903, USA*

**Structure refinement details**

Raw data images from the diffraction experiment were converted from Rigaku format to Bruker format via the program Eclipse (Parsons, Simon; 2010, ECLIPSE – Program for masking high pressure diffraction images and conversion between CCD image formats) for inspection, integration and scaling using APEX2 software (Bruker; 2007, Bruker AXS Inc., Madison, Wisconsin, USA). After integration, data were scaled and corrected for absorption using the program SADABS (Bruker; 2001, Bruker AXS Inc., Madison, Wisconsin, USA) to produce a merged, scaled HKLF file which was used for structure solution.

During refinement, badly disordered, partial occupancy toluene molecules were present, and were ultimately using the OLEX2 masking procedure. 593 electrons were recovered per unit cell in two voids (total volume 3075 Å<sup>3</sup>). All hydrogen atoms were introduced in calculated positions and refined on a riding model, except H7 and H8. H7 and H8 were introduced from different map positions and were refined positionally with a distance restraint. Their isotropic displacements rode on the parent atoms (O7 and O8, respectively). All non-hydrogen atoms were refined anisotropically. Two disordered t-butyl groups are present. These were refined as PARTs, with distance and anisotropic restraints/constraints.

Bond valence sum calculations show the oxidation state of each Cr atom to be +3 and therefore the bridging oxygen atom is assigned as hydroxide, for charge balance purposes.

1. Dolomanov, O.V., Bourhis, L.J., Gildea, R.J., Howard, J.A.K. & Puschmann, H. (2009), J. Appl. Cryst. 42, 339-341.
2. Sheldrick, G.M. (2008). Acta Cryst. A64, 112-122.

**Table S1:** Crystallographic and Structure Refinement Data

|                                             |                                                              |
|---------------------------------------------|--------------------------------------------------------------|
| Compound                                    | <b>4</b>                                                     |
| Chemical formula                            | $\text{C}_{66}\text{H}_{104}\text{Cr}_2\text{N}_2\text{O}_8$ |
| Formula weight                              | 1157.51                                                      |
| Temperature/K                               | 153(2)                                                       |
| Crystal system                              | monoclinic                                                   |
| Space group                                 | $P2_1/n$                                                     |
| $a/\text{\AA}$                              | 17.509(5)                                                    |
| $b/\text{\AA}$                              | 17.346(5)                                                    |
| $c/\text{\AA}$                              | 29.415(8)                                                    |
| $\alpha/^\circ$                             | 90                                                           |
| $\beta/^\circ$                              | 103.150(7)                                                   |
| $\gamma/^\circ$                             | 90                                                           |
| Volume/ $\text{\AA}^3$                      | 8699(4)                                                      |
| Z                                           | 4                                                            |
| $\rho_{\text{calc}}/\text{g cm}^{-3}$       | 0.884                                                        |
| Radiation type                              | $\text{MoK}\alpha(\lambda = 0.71073)$                        |
| $\mu(\text{MoK}\alpha)/\text{mm}^{-1}$      | 0.289                                                        |
| F(000)                                      | 2504.0                                                       |
| Crystal size/ $\text{mm}^3$                 | $0.16 \times 0.14 \times 0.08$                               |
| Reflections collected                       | 29311                                                        |
| Unique reflections                          | 15222                                                        |
| $R_{\text{int}}$                            | 0.0452                                                       |
| $R_{\text{sigma}}$                          | 0.1009                                                       |
| $R_1$ (all)                                 | 0.1686                                                       |
| $wR(F_2)$ (all)                             | 0.3753                                                       |
| $R_I$ ( $I > 2\sigma(I)$ ) <sup>a</sup>     | 0.1105                                                       |
| $wR(F_2)$ ( $I > 2\sigma(I)$ ) <sup>b</sup> | 0.3459                                                       |
| Goodness of fit on $F^2$                    | 1.160                                                        |
| CCDC Ref.                                   | <b>2075754</b>                                               |

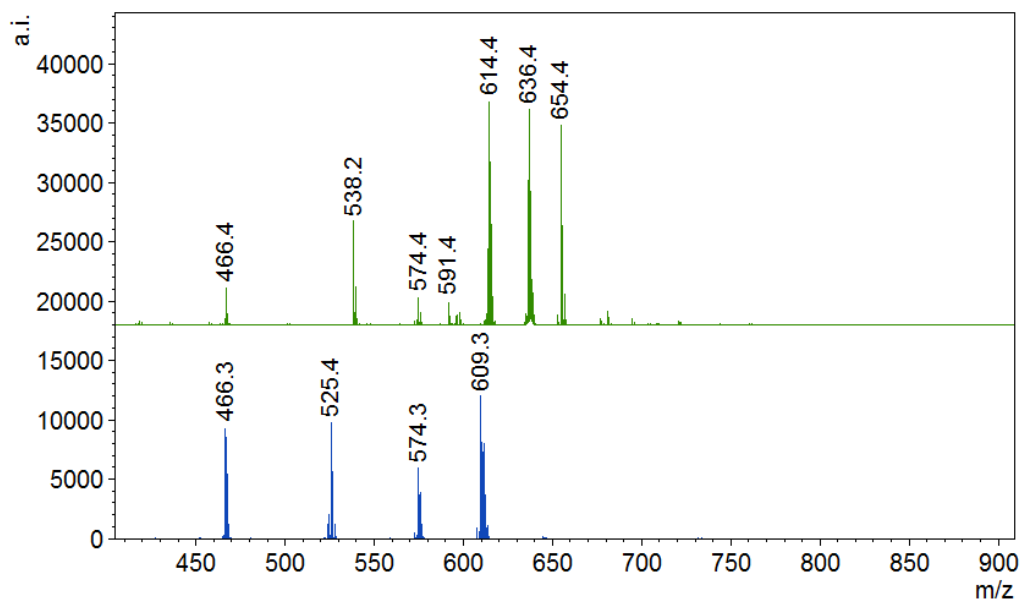

**Figure S1.** MALDI-TOF mass spectra of CrCl(THF)[L] (**1**) (blue, bottom) and CrOH[L] (**2**) (green, top).

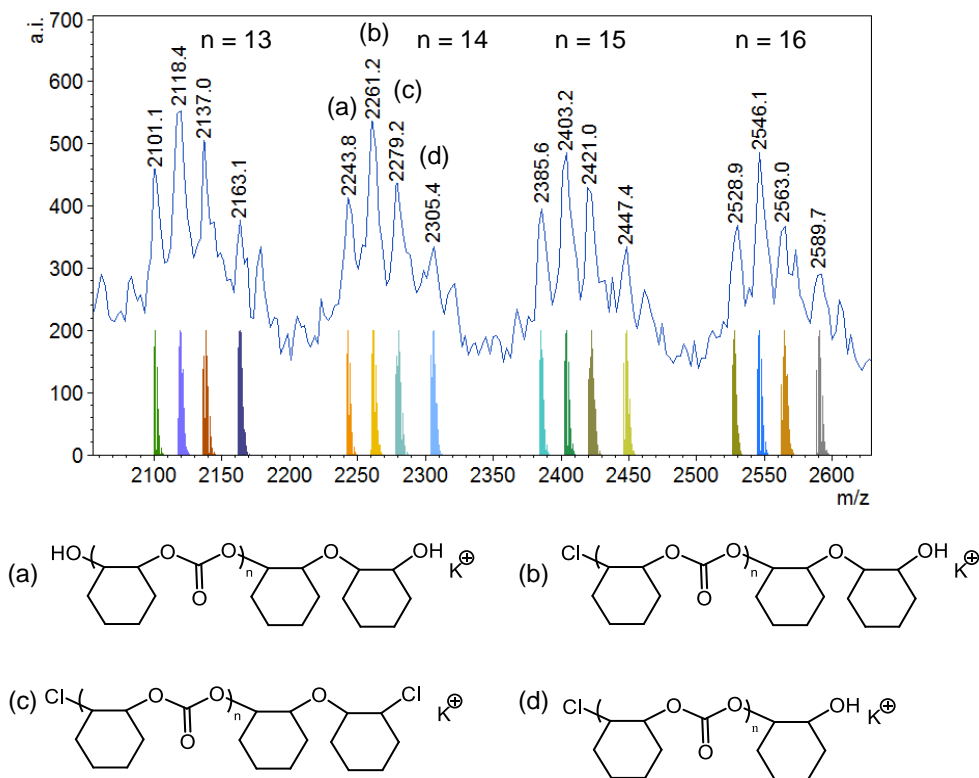

**Figure S2.** Magnified section of MALDI-TOF mass spectrum for PCHC ( $n = 13\text{--}16$ ) obtained using **2** with PPNCl as cocatalyst (Table 1, entry 2). Modeled isotopic masses for polymers (a–d) containing different end groups are shown below the experimental spectrum.

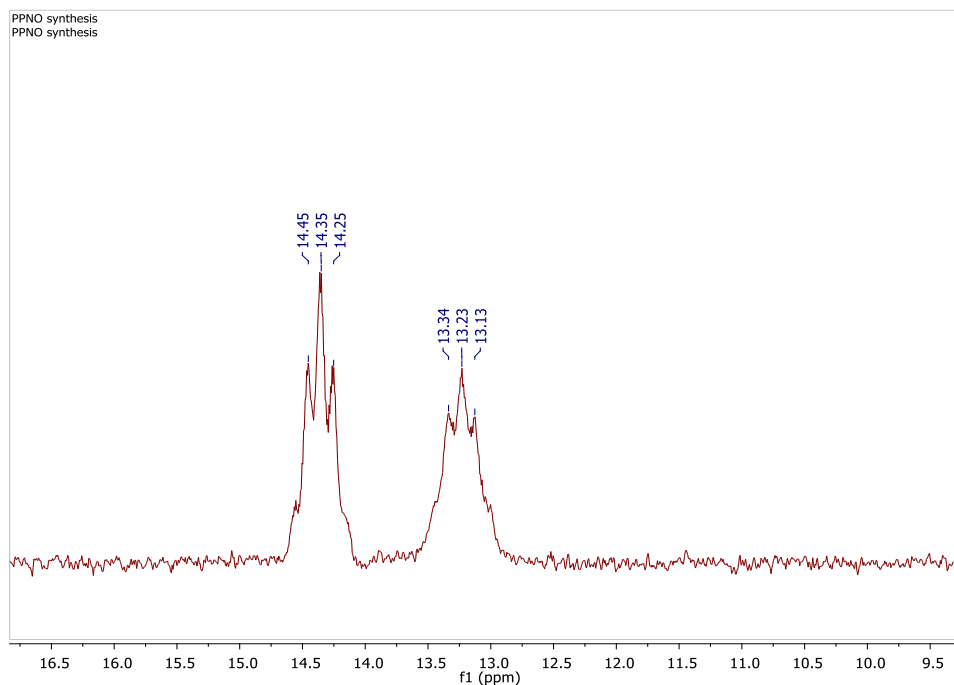

**Figure S3.**  $^{31}\text{P}$  ( $^1\text{H}$ -coupled) NMR spectrum in  $\text{CDCl}_3$  of  $\text{Ph}_2\text{P}(\text{O})\text{NPPH}_3$  obtained from  $\text{PPNCl}$  and  $\text{NaOH}$ .

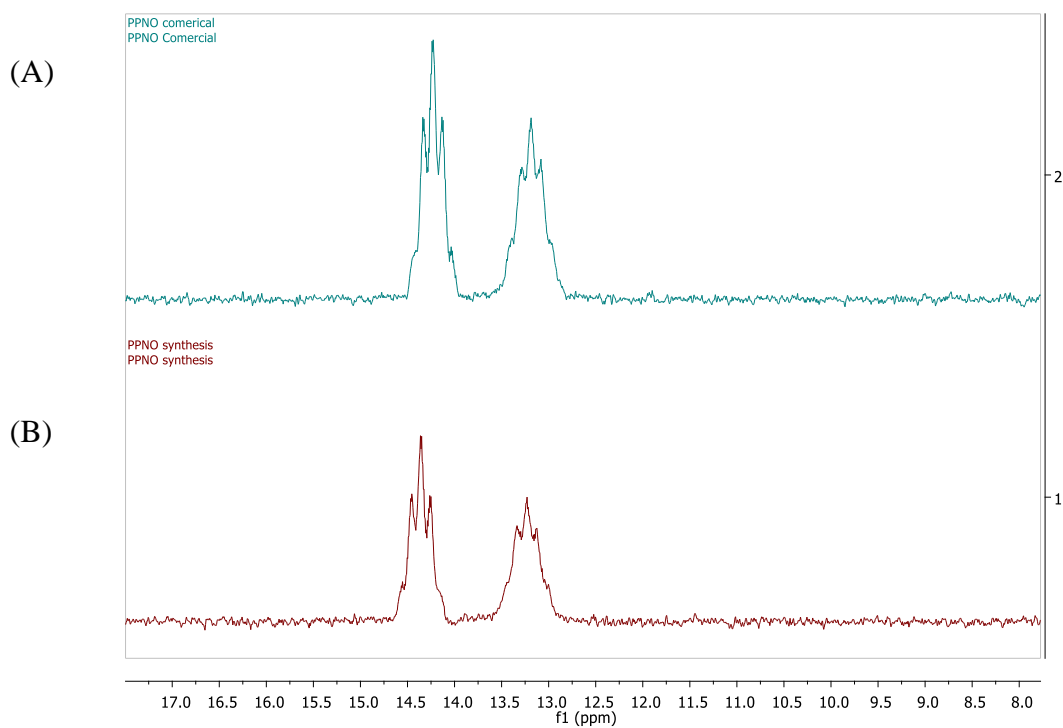

**Figure S4.**  $^{31}\text{P}$  ( $^1\text{H}$ -coupled) NMR spectra in  $\text{CDCl}_3$  of commercial  $\text{Ph}_2\text{P}(\text{O})\text{NPPH}_3$  (red, bottom) and  $\text{Ph}_2\text{P}(\text{O})\text{NPPH}_3$  obtained from  $\text{PPNCl}$  and  $\text{NaOH}$  (blue, top).

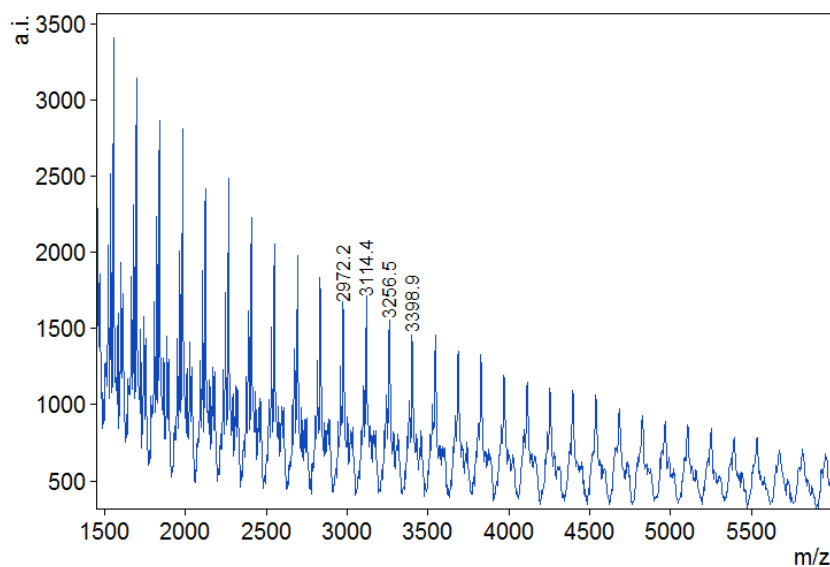

**Figure S5.** MALDI-TOF mass spectrum of PCHC using  $\text{Ph}_2\text{P}(\text{O})\text{NPPH}_3$  as cocatalyst (Table 1, entry 3).

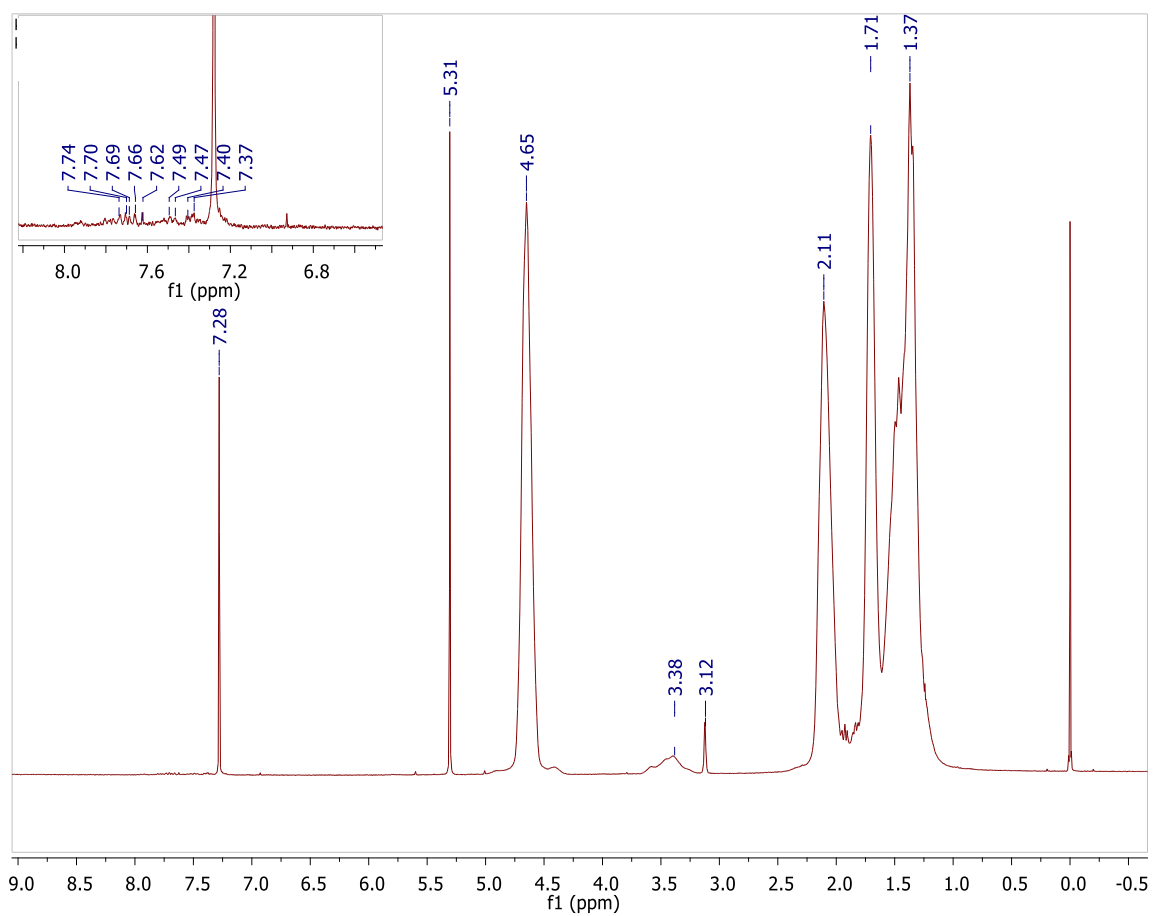

**Figure S6.**  $^1\text{H}$  NMR spectrum in  $\text{CDCl}_3$  of polycarbonate obtained from **2** and  $\text{Ph}_2\text{P}(\text{O})\text{NPPH}_3$  (Table 1, entry 3)

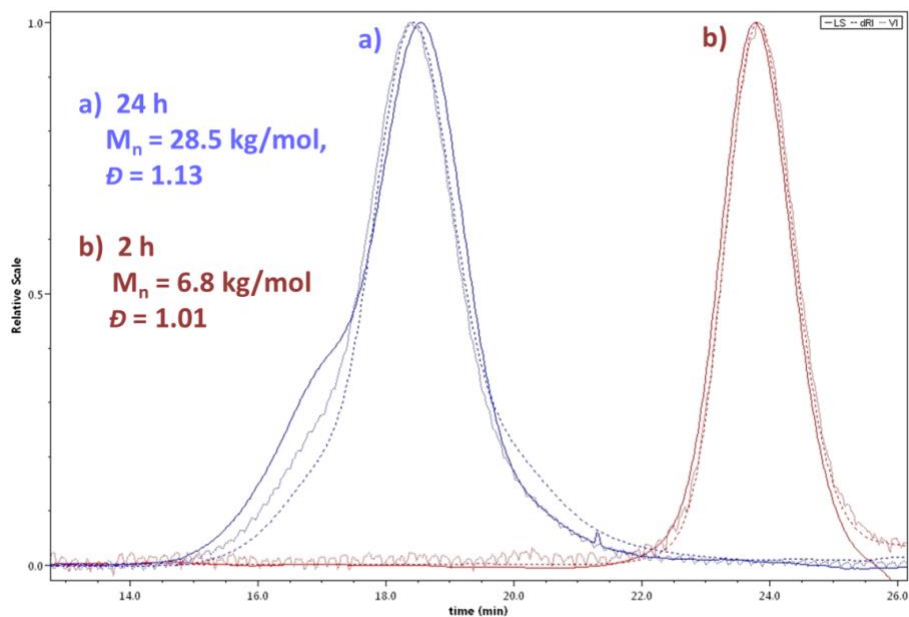

**Figure S7.** GPC traces determined by triple detection of the polymers obtained from CHO/CO<sub>2</sub> copolymerization by **2** and Ph<sub>2</sub>P(O)NPPPh<sub>3</sub> with different reaction times (a) 24 h (b) 2 h.

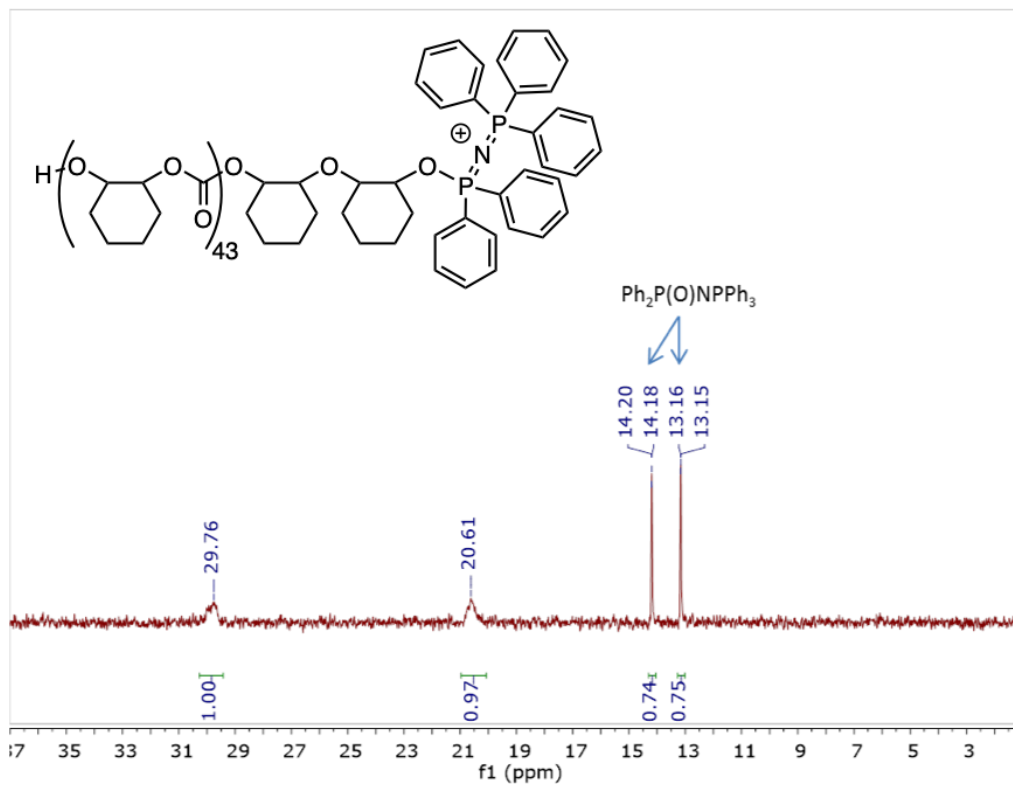

**Figure S8.** <sup>31</sup>P{<sup>1</sup>H} NMR spectrum in CDCl<sub>3</sub> of the polymer obtained from CHO/CO<sub>2</sub> copolymerization by **2** and Ph<sub>2</sub>P(O)NPPPh<sub>3</sub> for 2 h, with unreacted Ph<sub>2</sub>P(O)NPPPh<sub>3</sub> as shown.

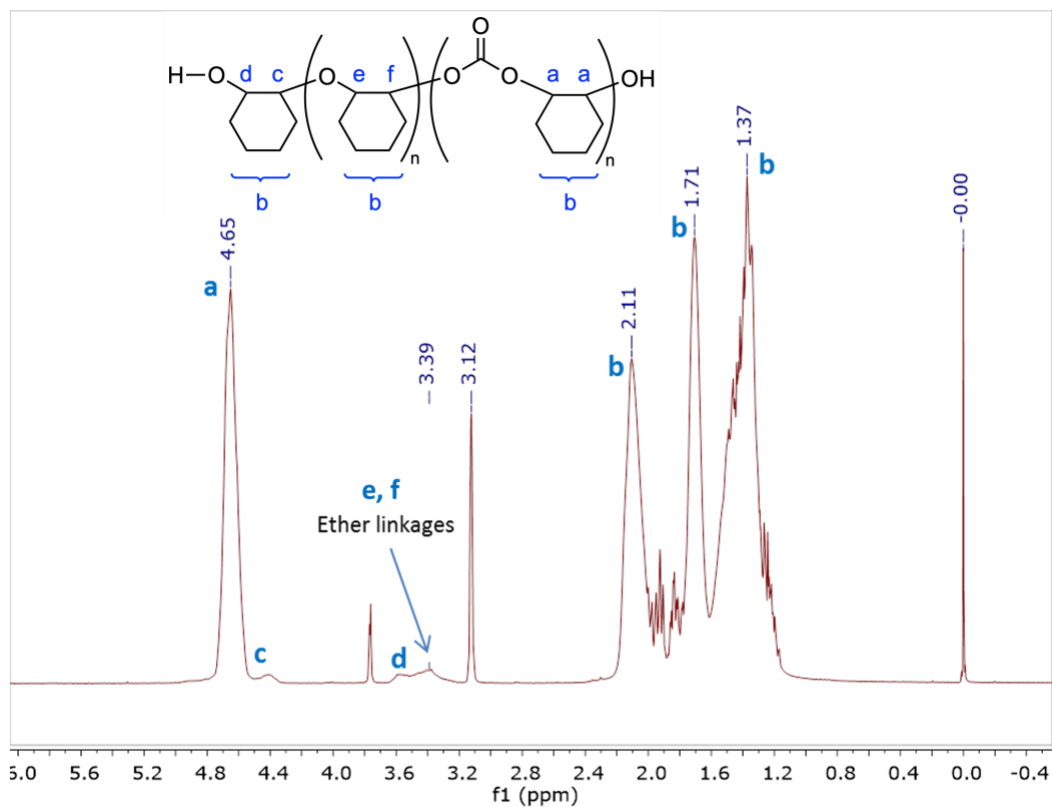

**Figure S9.**  $^1\text{H}$  NMR spectrum in CDCl<sub>3</sub> of crude polycarbonate diol obtained from **2** and Bu<sub>4</sub>NOH (Table 1, entry 4).

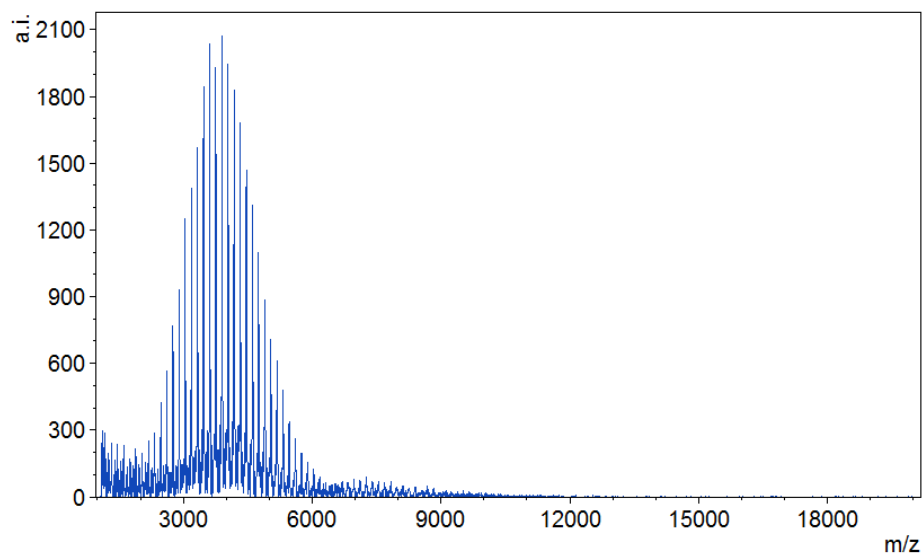

**Figure S10.** MALDI-TOF mass spectrum of PCHC using Bu<sub>4</sub>NOH as cocatalyst (Table 1, entry 4).

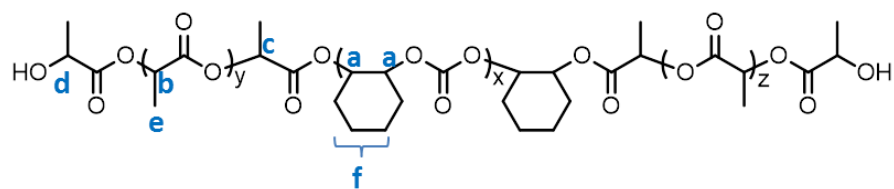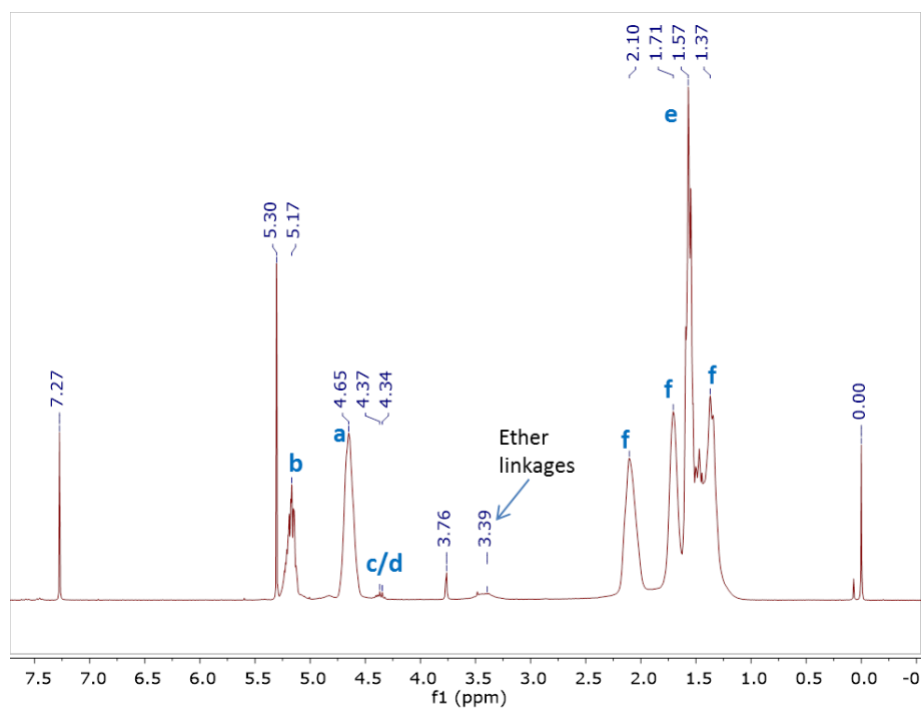

**Figure S11.** Representative  $^1\text{H}$  NMR spectrum in  $\text{CDCl}_3$  of triblock copolymer (Table 2, entry 2).

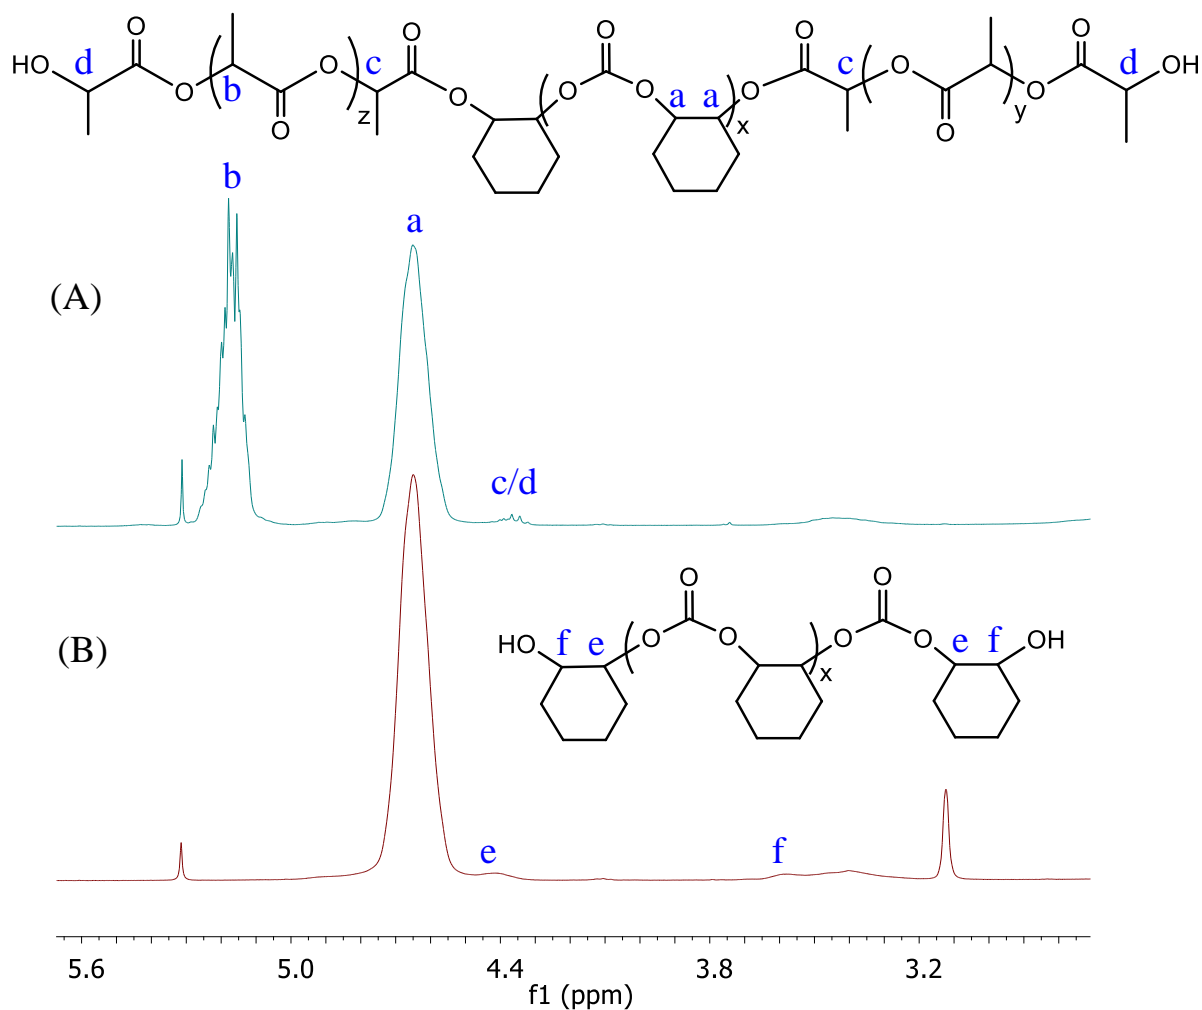

**Figure S12.**  $^1\text{H}$  NMR spectra in  $\text{CDCl}_3$  of (A) PLA-PCHC-PLA, (Table 2, entry 1), and (B) PCHC, (Table 1, entry 4). Resonances at 3.4 ppm and 5.3 ppm in spectra (A) and (B) correspond to ether linkages and  $\text{CH}_2\text{Cl}_2$ , respectively. The resonance at 3.1 ppm in (B) corresponds to unreacted cyclohexene oxide.

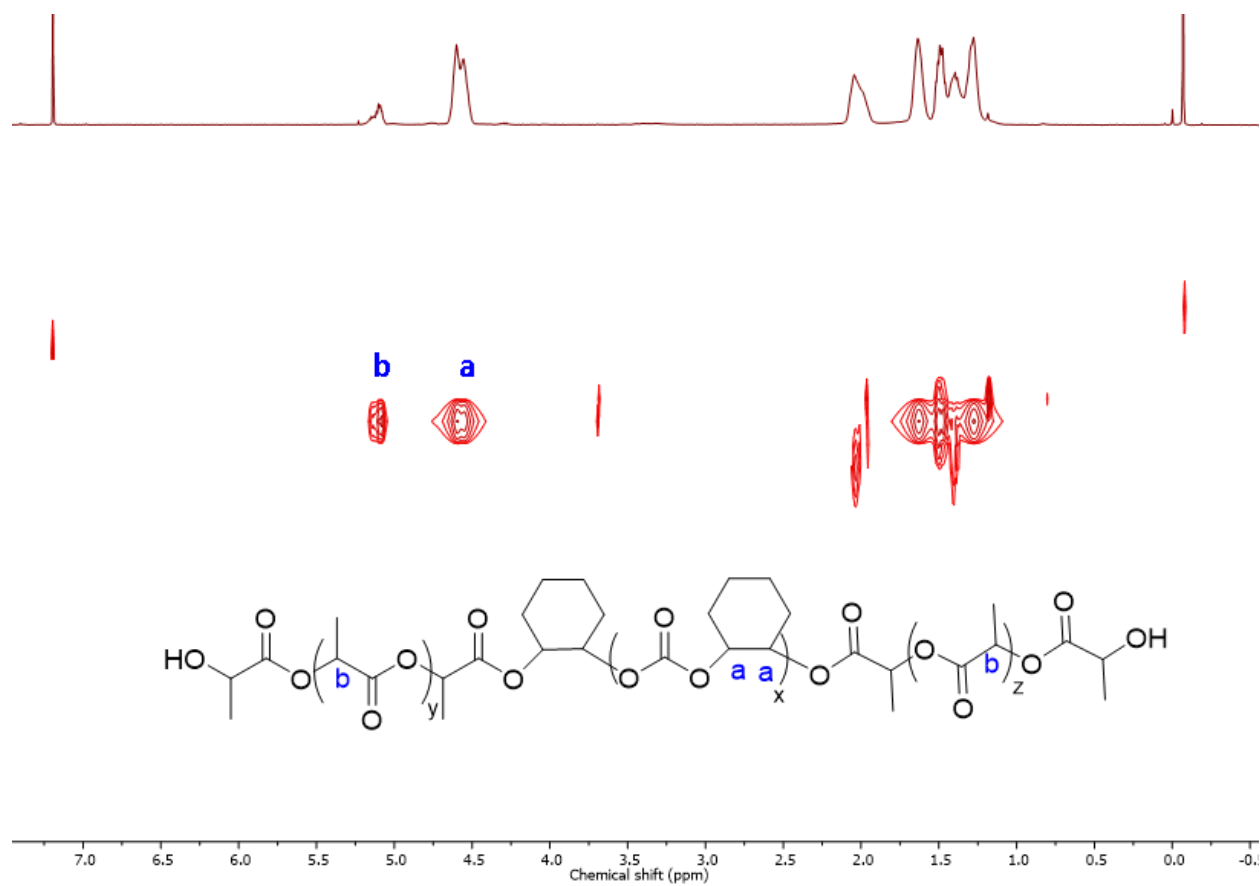

**Figure S13.** Representative  $^1\text{H}$  DOSY NMR spectrum in  $\text{CDCl}_3$  of triblock copolymer.

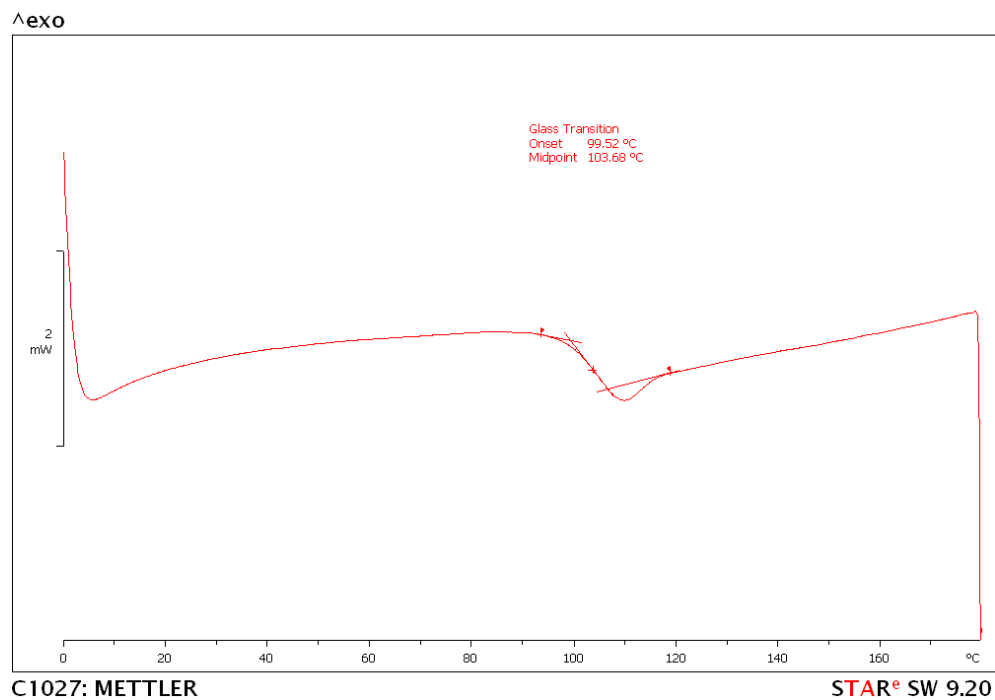

**Figure S14.** DSC second heating curves of polycarbonate obtained from **2** and PPNCl (Table 1, entry 2).

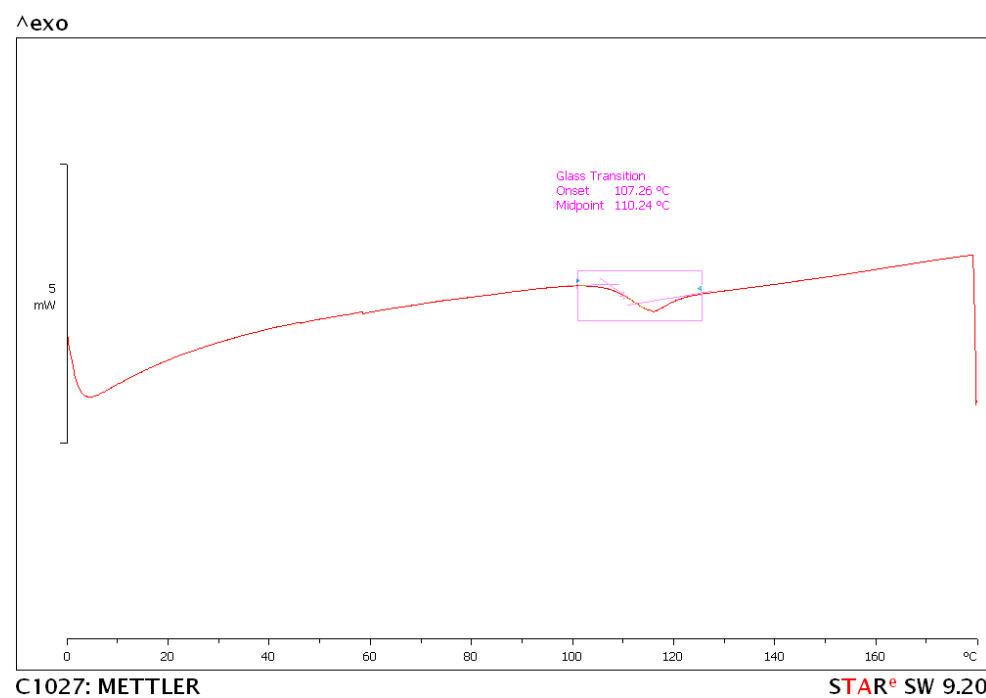

**Figure S15.** DSC second heating curves of polycarbonate obtained from **2** and Ph<sub>2</sub>P(O)NPh<sub>3</sub> (Table 1, entry 3).

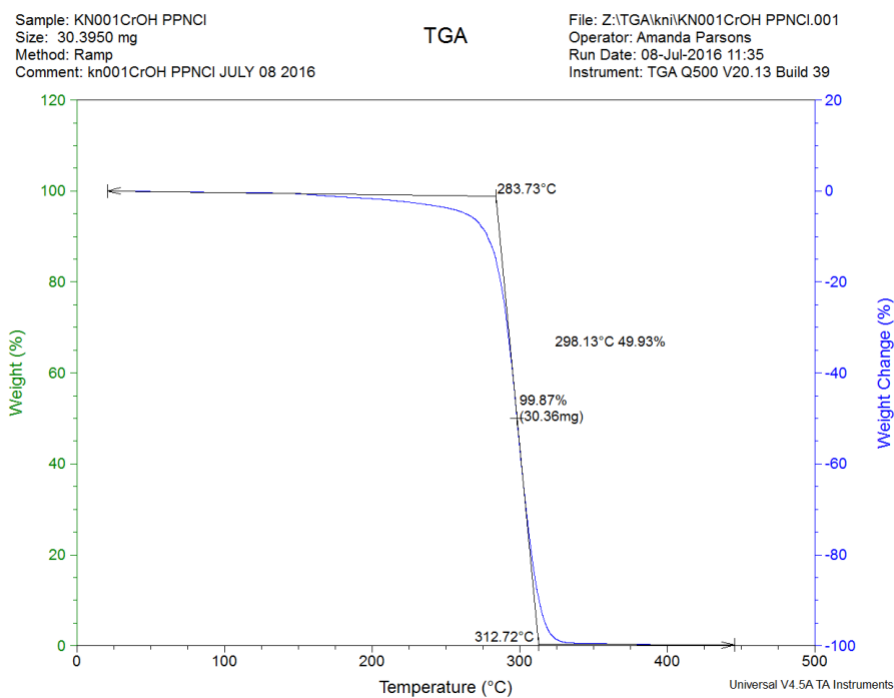

**Figure S16.** TGA curve of PCHC at a heating rate of 10 °C/min (Table 1, entry 2).

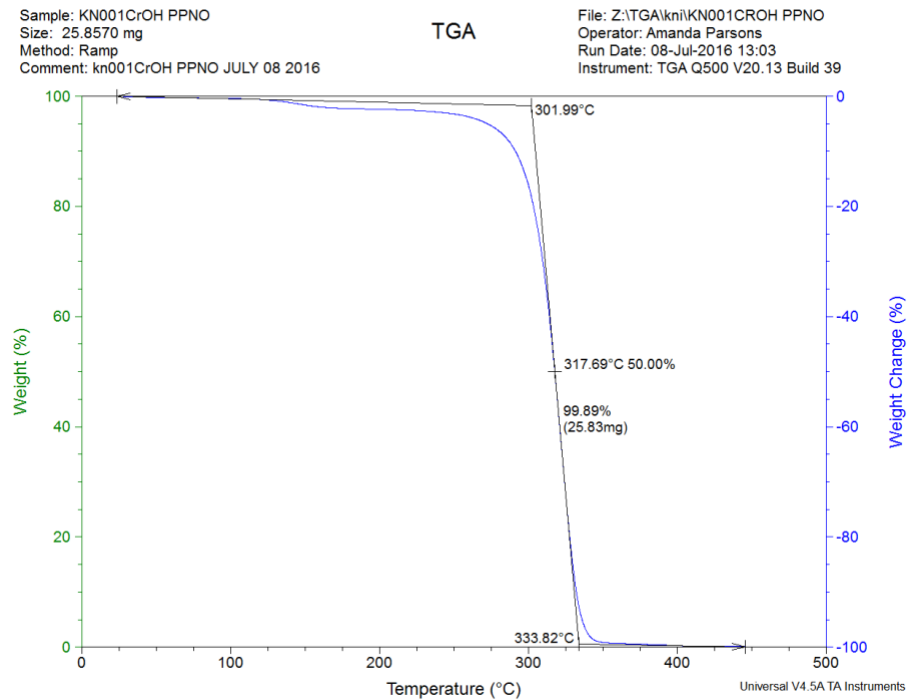

**Figure S17.** TGA curve of PCHC initiated by PPNO at a heating rate of 10 °C/min (Table 1, entry 3).

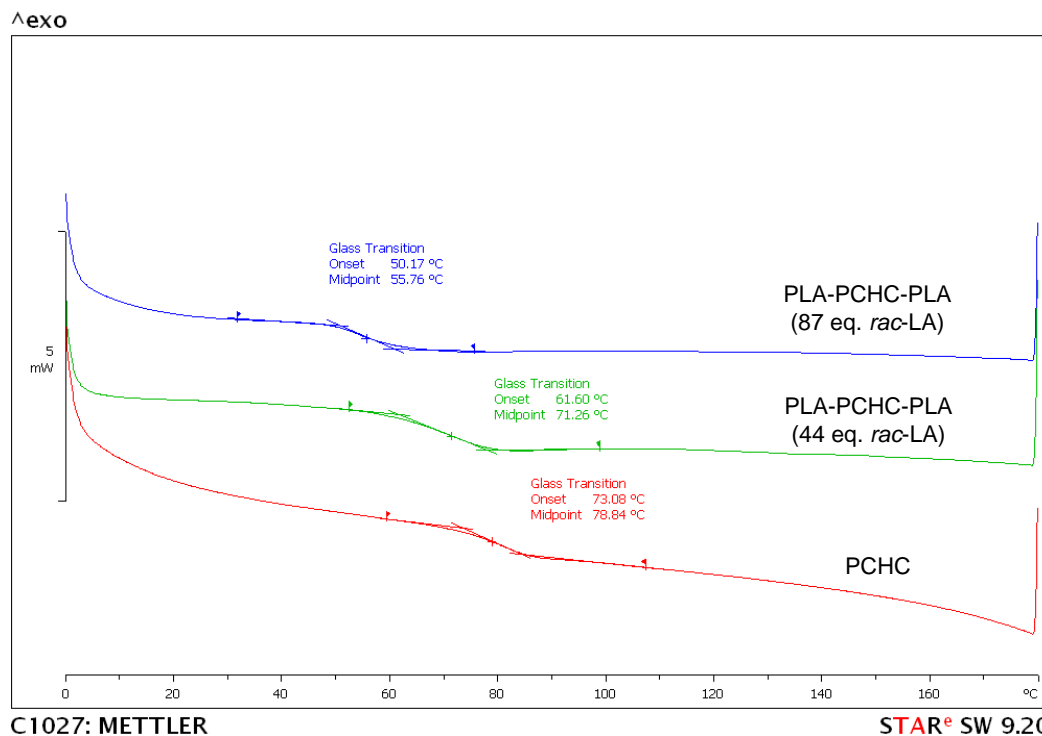

**Figure S17.** DSC second heating curves of PCHC (Table 1, entry 4) and PLA-PCHC-PLA (Table 2, entries 1 and 2).

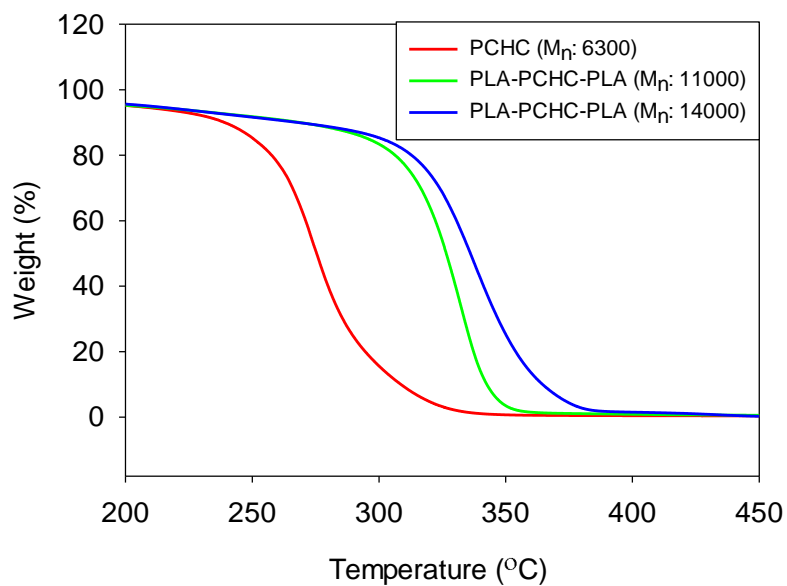

**Figure S18.** TGA curves of PCHC (Table 1, entry 4) and PLA-PCHC-PLA (Table 2, entries 1 and 2).
